# Supplementary material
Source: MDPI journal article supplement (https://www.mdpi.com/2073-4352/1/3/171)
Supplement: s1 [file s1]

 data_I 
 
_audit_creation_method            SHELXL-97 
_chemical_name_systematic 
; 
 ? 
; 
_chemical_name_common             ? 
_chemical_melting_point           ? 
_chemical_formula_moiety               'C15 H12 N2 O2 S '
_chemical_formula_sum 
 'C15 H12 N2 O2 S' 
_chemical_formula_weight          284.33 
 
loop_ 
 _atom_type_symbol 
 _atom_type_description 
 _atom_type_scat_dispersion_real 
 _atom_type_scat_dispersion_imag 
 _atom_type_scat_source 
 'C'  'C'   0.0033   0.0016 
 'International Tables Vol C Tables 4.2.6.8 and 6.1.1.4' 
 'H'  'H'   0.0000   0.0000 
 'International Tables Vol C Tables 4.2.6.8 and 6.1.1.4' 
 'O'  'O'   0.0106   0.0060 
 'International Tables Vol C Tables 4.2.6.8 and 6.1.1.4' 
 'N'  'N'   0.0061   0.0033 
 'International Tables Vol C Tables 4.2.6.8 and 6.1.1.4' 
 'S'  'S'   0.1246   0.1234 
 'International Tables Vol C Tables 4.2.6.8 and 6.1.1.4' 
 
_symmetry_cell_setting                 monoclinic
_symmetry_space_group_name_H-M        'P 1 21 1'
_symmetry_space_group_name_Hall       'P 2yb'
_symmetry_Int_Tables_number            4
loop_ 
 _symmetry_equiv_pos_as_xyz 
 'x, y, z' 
 '-x, y+1/2, -z' 
 
_cell_length_a                    9.9349(8) 
_cell_length_b                    6.3377(5) 
_cell_length_c                    10.5783(10) 
_cell_angle_alpha                 90.00 
_cell_angle_beta                  97.752(3) 
_cell_angle_gamma                 90.00 
_cell_volume                      659.97(10) 
_cell_formula_units_Z             2 
_cell_measurement_reflns_used          12459
_cell_measurement_theta_min            3.0
_cell_measurement_theta_max            30.0
_cell_measurement_temperature          180(1)
 
_exptl_crystal_description            'block'
_exptl_crystal_colour                 'colorless'
_exptl_crystal_size_max           0.38 
_exptl_crystal_size_mid           0.36 
_exptl_crystal_size_min           0.13 
_exptl_crystal_density_meas       ? 
_exptl_crystal_density_diffrn     1.431 
_exptl_crystal_density_method     'not measured' 
_exptl_crystal_F_000              296 
_exptl_absorpt_coefficient_mu     0.247 
_exptl_absorpt_correction_type         numerical
_exptl_absorpt_process_details         
;
    Higashi, T. (1999). NUMABS.
    Rigaku Corporation, Tokyo, Japan.
;
_exptl_absorpt_correction_T_min        0.915
_exptl_absorpt_correction_T_max        0.968
 
_exptl_special_details 
; 
 ? 
; 
 
_diffrn_ambient_temperature       180(1) 
_diffrn_radiation_wavelength      0.71075 
_diffrn_radiation_type            MoK\a 
_diffrn_radiation_source          'fine-focus sealed tube' 
_diffrn_radiation_monochromator   graphite 
_diffrn_measurement_device_type       'Rigaku RAXIS-RAPID'
_diffrn_measurement_method             \w
_diffrn_detector_area_resol_mean       10.00
_diffrn_standards_number          ? 
_diffrn_standards_interval_count  ? 
_diffrn_standards_interval_time   ? 
_diffrn_standards_decay_%         ? 
_diffrn_reflns_number             12985 
_diffrn_reflns_av_R_equivalents   0.0142 
_diffrn_reflns_av_sigmaI/netI     0.0122 
_diffrn_reflns_limit_h_min        -13 
_diffrn_reflns_limit_h_max        13 
_diffrn_reflns_limit_k_min        -8 
_diffrn_reflns_limit_k_max        8 
_diffrn_reflns_limit_l_min        -14 
_diffrn_reflns_limit_l_max        14 
_diffrn_reflns_theta_min          3.02 
_diffrn_reflns_theta_max          29.97 
_reflns_number_total              3719 
_reflns_number_gt                 3655 
_reflns_threshold_expression      >2sigma(I) 
 
_computing_data_collection 
'PROCESS-AUTO (Rigaku/MSC, 2004)'
_computing_cell_refinement            'PROCESS-AUTO'
_computing_data_reduction          
'CrystalStructure (Rigaku/MSC, 2004)'
_computing_structure_solution     'SHELXS-97 (Sheldrick, 2008)' 
_computing_structure_refinement   'SHELXL-97 (Sheldrick, 2008)' 
_computing_molecular_graphics     ? 
_computing_publication_material   ? 
 
_refine_special_details 
; 
 Refinement of F^2^ against ALL reflections.  The weighted R-factor wR and 
 goodness of fit S are based on F^2^, conventional R-factors R are based 
 on F, with F set to zero for negative F^2^. The threshold expression of 
 F^2^ > 2sigma(F^2^) is used only for calculating R-factors(gt) etc. and is 
 not relevant to the choice of reflections for refinement.  R-factors based 
 on F^2^ are statistically about twice as large as those based on F, and R- 
 factors based on ALL data will be even larger. 
; 
 
_refine_ls_structure_factor_coef  Fsqd  
_refine_ls_matrix_type            full 
_refine_ls_weighting_scheme       calc  
_refine_ls_weighting_details 
 'calc w=1/[\s^2^(Fo^2^)+(0.0498P)^2^+0.0632P] where P=(Fo^2^+2Fc^2^)/3' 
_atom_sites_solution_primary      direct 
_atom_sites_solution_secondary    difmap 
_atom_sites_solution_hydrogens    geom 
_refine_ls_hydrogen_treatment     mixed 
_refine_ls_extinction_method      none 
_refine_ls_extinction_coef        ? 
_refine_ls_abs_structure_details 
 'Flack H D (1983), Acta Cryst. A39, 876-881' 
_refine_ls_abs_structure_Flack    0.00(4) 
_refine_ls_number_reflns          3719 
_refine_ls_number_parameters      185 
_refine_ls_number_restraints      1 
_refine_ls_R_factor_all           0.0271 
_refine_ls_R_factor_gt            0.0266 
_refine_ls_wR_factor_ref          0.0704 
_refine_ls_wR_factor_gt           0.0702 
_refine_ls_goodness_of_fit_ref    1.074 
_refine_ls_restrained_S_all       1.074 
_refine_ls_shift/su_max           0.000 
_refine_ls_shift/su_mean          0.000 
 
loop_ 
 _atom_site_label 
 _atom_site_type_symbol 
 _atom_site_fract_x 
 _atom_site_fract_y 
 _atom_site_fract_z 
 _atom_site_U_iso_or_equiv 
 _atom_site_adp_type 
 _atom_site_occupancy 
 _atom_site_symmetry_multiplicity 
 _atom_site_calc_flag 
 _atom_site_refinement_flags 
 _atom_site_disorder_assembly 
 _atom_site_disorder_group 
S1 S 0.38118(2) 0.19812(4) 0.07511(2) 0.02097(7) Uani 1 1 d . . . 
O1 O 0.72537(9) 0.64945(17) 0.32903(10) 0.0408(3) Uani 1 1 d . . . 
O2 O 0.16220(9) 0.75472(14) 0.47426(8) 0.02817(18) Uani 1 1 d . . . 
N1 N 0.64575(9) 0.15805(14) 0.09518(9) 0.02055(18) Uani 1 1 d . . . 
N2 N 0.57408(9) 0.41387(14) 0.22686(8) 0.01994(17) Uani 1 1 d . . . 
C1 C 0.54129(10) 0.25936(16) 0.13628(9) 0.01803(18) Uani 1 1 d . . . 
C2 C 0.70695(11) 0.49645(19) 0.26014(10) 0.0242(2) Uani 1 1 d . . . 
C3 C 0.81490(10) 0.38301(18) 0.20725(9) 0.02135(19) Uani 1 1 d . . . 
C4 C 0.95146(11) 0.4417(2) 0.23803(10) 0.0264(2) Uani 1 1 d . . . 
H4 H 0.9750 0.5592 0.2923 0.032 Uiso 1 1 calc R . . 
C5 C 1.05163(11) 0.3290(2) 0.18965(10) 0.0267(2) Uani 1 1 d . . . 
H5 H 1.1442 0.3683 0.2107 0.032 Uiso 1 1 calc R . . 
C6 C 1.01657(10) 0.1567(2) 0.10949(11) 0.0273(2) Uani 1 1 d . . . 
H6 H 1.0859 0.0797 0.0762 0.033 Uiso 1 1 calc R . . 
C7 C 0.88249(10) 0.0967(2) 0.07797(11) 0.0259(2) Uani 1 1 d . . . 
H7 H 0.8593 -0.0204 0.0233 0.031 Uiso 1 1 calc R . . 
C8 C 0.78169(9) 0.2111(2) 0.12783(9) 0.02009(17) Uani 1 1 d . . . 
C9 C 0.46691(10) 0.50768(17) 0.28857(9) 0.01977(18) Uani 1 1 d . . . 
C10 C 0.42443(11) 0.40430(17) 0.39236(10) 0.02182(19) Uani 1 1 d . . . 
H10 H 0.4647 0.2741 0.4214 0.026 Uiso 1 1 calc R . . 
C11 C 0.32281(11) 0.49303(18) 0.45289(10) 0.02226(19) Uani 1 1 d . . . 
H11 H 0.2932 0.4235 0.5238 0.027 Uiso 1 1 calc R . . 
C12 C 0.26387(10) 0.68431(19) 0.40993(9) 0.02035(17) Uani 1 1 d . . . 
C13 C 0.30852(12) 0.78939(17) 0.30769(10) 0.0229(2) Uani 1 1 d . . . 
H13 H 0.2694 0.9206 0.2792 0.028 Uiso 1 1 calc R . . 
C14 C 0.41157(10) 0.6997(2) 0.24747(9) 0.02290(18) Uani 1 1 d . . . 
H14 H 0.4435 0.7707 0.1783 0.027 Uiso 1 1 calc R . . 
C15 C 0.09041(14) 0.9396(2) 0.42638(13) 0.0327(2) Uani 1 1 d . . . 
H15A H 0.0117 0.9610 0.4717 0.049 Uiso 1 1 calc R . . 
H15B H 0.0595 0.9224 0.3350 0.049 Uiso 1 1 calc R . . 
H15C H 0.1507 1.0623 0.4396 0.049 Uiso 1 1 calc R . . 
H1 H 0.6297(15) 0.070(3) 0.0416(15) 0.024(4) Uiso 1 1 d . . . 
 
loop_ 
 _atom_site_aniso_label 
 _atom_site_aniso_U_11 
 _atom_site_aniso_U_22 
 _atom_site_aniso_U_33 
 _atom_site_aniso_U_23 
 _atom_site_aniso_U_13 
 _atom_site_aniso_U_12 
S1 0.01602(10) 0.01977(11) 0.02682(11) 0.00081(10) 0.00175(7) -0.00038(9) 
O1 0.0303(4) 0.0397(6) 0.0518(6) -0.0285(5) 0.0041(4) -0.0031(4) 
O2 0.0291(4) 0.0280(4) 0.0305(4) 0.0034(3) 0.0152(3) 0.0062(3) 
N1 0.0161(3) 0.0204(5) 0.0249(4) -0.0074(3) 0.0017(3) -0.0003(3) 
N2 0.0185(4) 0.0199(4) 0.0218(4) -0.0038(3) 0.0040(3) 0.0015(3) 
C1 0.0176(4) 0.0173(4) 0.0194(4) 0.0007(3) 0.0032(3) 0.0003(3) 
C2 0.0214(5) 0.0247(5) 0.0264(5) -0.0081(4) 0.0029(4) -0.0010(4) 
C3 0.0187(4) 0.0239(5) 0.0212(4) -0.0038(4) 0.0020(3) -0.0011(4) 
C4 0.0214(5) 0.0311(6) 0.0262(5) -0.0057(4) 0.0018(4) -0.0055(4) 
C5 0.0185(4) 0.0364(6) 0.0250(5) 0.0004(4) 0.0022(4) -0.0041(4) 
C6 0.0183(4) 0.0346(7) 0.0300(5) -0.0027(4) 0.0068(4) 0.0010(4) 
C7 0.0198(5) 0.0286(6) 0.0299(5) -0.0092(4) 0.0055(4) -0.0003(4) 
C8 0.0167(4) 0.0225(4) 0.0213(4) -0.0026(4) 0.0030(3) 0.0004(4) 
C9 0.0201(4) 0.0191(4) 0.0208(4) -0.0013(3) 0.0054(3) 0.0026(4) 
C10 0.0238(4) 0.0184(4) 0.0233(4) 0.0033(3) 0.0035(4) 0.0023(4) 
C11 0.0244(5) 0.0216(4) 0.0216(4) 0.0037(4) 0.0061(4) -0.0001(4) 
C12 0.0211(4) 0.0196(4) 0.0212(4) -0.0010(4) 0.0059(3) -0.0004(4) 
C13 0.0281(5) 0.0180(4) 0.0237(4) 0.0038(4) 0.0075(4) 0.0041(4) 
C14 0.0275(4) 0.0205(4) 0.0222(4) 0.0042(4) 0.0088(3) 0.0042(5) 
C15 0.0313(5) 0.0304(6) 0.0381(6) 0.0011(5) 0.0115(5) 0.0109(5) 
 
_geom_special_details 
; 
 All esds (except the esd in the dihedral angle between two l.s. planes) 
 are estimated using the full covariance matrix.  The cell esds are taken 
 into account individually in the estimation of esds in distances, angles 
 and torsion angles; correlations between esds in cell parameters are only 
 used when they are defined by crystal symmetry.  An approximate (isotropic) 
 treatment of cell esds is used for estimating esds involving l.s. planes. 
; 
 
loop_ 
 _geom_bond_atom_site_label_1 
 _geom_bond_atom_site_label_2 
 _geom_bond_distance 
 _geom_bond_site_symmetry_2 
 _geom_bond_publ_flag 
S1 C1 1.6799(10) . ? 
O1 C2 1.2119(14) . ? 
O2 C12 1.3667(12) . ? 
O2 C15 1.4287(15) . ? 
N1 C1 1.3417(12) . ? 
N1 C8 1.3893(12) . ? 
N1 H1 0.798(17) . ? 
N2 C1 1.3780(13) . ? 
N2 C2 1.4196(13) . ? 
N2 C9 1.4493(12) . ? 
C2 C3 1.4635(14) . ? 
C3 C8 1.3884(15) . ? 
C3 C4 1.4020(14) . ? 
C4 C5 1.3784(15) . ? 
C4 H4 0.9500 . ? 
C5 C6 1.3973(17) . ? 
C5 H5 0.9500 . ? 
C6 C7 1.3822(14) . ? 
C6 H6 0.9500 . ? 
C7 C8 1.3961(14) . ? 
C7 H7 0.9500 . ? 
C9 C14 1.3810(15) . ? 
C9 C10 1.3920(13) . ? 
C10 C11 1.3857(14) . ? 
C10 H10 0.9500 . ? 
C11 C12 1.3955(16) . ? 
C11 H11 0.9500 . ? 
C12 C13 1.3926(14) . ? 
C13 C14 1.3976(13) . ? 
C13 H13 0.9500 . ? 
C14 H14 0.9500 . ? 
C15 H15A 0.9800 . ? 
C15 H15B 0.9800 . ? 
C15 H15C 0.9800 . ? 
 
loop_ 
 _geom_angle_atom_site_label_1 
 _geom_angle_atom_site_label_2 
 _geom_angle_atom_site_label_3 
 _geom_angle 
 _geom_angle_site_symmetry_1 
 _geom_angle_site_symmetry_3 
 _geom_angle_publ_flag 
C12 O2 C15 117.29(9) . . ? 
C1 N1 C8 124.90(9) . . ? 
C1 N1 H1 118.5(11) . . ? 
C8 N1 H1 116.2(11) . . ? 
C1 N2 C2 123.99(8) . . ? 
C1 N2 C9 119.05(8) . . ? 
C2 N2 C9 116.88(8) . . ? 
N1 C1 N2 116.41(9) . . ? 
N1 C1 S1 119.89(7) . . ? 
N2 C1 S1 123.69(7) . . ? 
O1 C2 N2 120.27(10) . . ? 
O1 C2 C3 124.33(10) . . ? 
N2 C2 C3 115.40(9) . . ? 
C8 C3 C4 119.48(9) . . ? 
C8 C3 C2 119.36(9) . . ? 
C4 C3 C2 121.13(9) . . ? 
C5 C4 C3 120.06(10) . . ? 
C5 C4 H4 120.0 . . ? 
C3 C4 H4 120.0 . . ? 
C4 C5 C6 119.79(10) . . ? 
C4 C5 H5 120.1 . . ? 
C6 C5 H5 120.1 . . ? 
C7 C6 C5 120.98(10) . . ? 
C7 C6 H6 119.5 . . ? 
C5 C6 H6 119.5 . . ? 
C6 C7 C8 118.88(10) . . ? 
C6 C7 H7 120.6 . . ? 
C8 C7 H7 120.6 . . ? 
C3 C8 N1 118.94(9) . . ? 
C3 C8 C7 120.81(9) . . ? 
N1 C8 C7 120.22(10) . . ? 
C14 C9 C10 120.85(9) . . ? 
C14 C9 N2 120.34(9) . . ? 
C10 C9 N2 118.78(9) . . ? 
C11 C10 C9 119.39(9) . . ? 
C11 C10 H10 120.3 . . ? 
C9 C10 H10 120.3 . . ? 
C10 C11 C12 120.13(9) . . ? 
C10 C11 H11 119.9 . . ? 
C12 C11 H11 119.9 . . ? 
O2 C12 C13 124.39(10) . . ? 
O2 C12 C11 115.30(9) . . ? 
C13 C12 C11 120.31(9) . . ? 
C12 C13 C14 119.28(10) . . ? 
C12 C13 H13 120.4 . . ? 
C14 C13 H13 120.4 . . ? 
C9 C14 C13 120.00(9) . . ? 
C9 C14 H14 120.0 . . ? 
C13 C14 H14 120.0 . . ? 
O2 C15 H15A 109.5 . . ? 
O2 C15 H15B 109.5 . . ? 
H15A C15 H15B 109.5 . . ? 
O2 C15 H15C 109.5 . . ? 
H15A C15 H15C 109.5 . . ? 
H15B C15 H15C 109.5 . . ? 
 
loop_ 
 _geom_torsion_atom_site_label_1 
 _geom_torsion_atom_site_label_2 
 _geom_torsion_atom_site_label_3 
 _geom_torsion_atom_site_label_4 
 _geom_torsion 
 _geom_torsion_site_symmetry_1 
 _geom_torsion_site_symmetry_2 
 _geom_torsion_site_symmetry_3 
 _geom_torsion_site_symmetry_4 
 _geom_torsion_publ_flag 
C8 N1 C1 N2 -6.47(15) . . . . ? 
C8 N1 C1 S1 172.35(8) . . . . ? 
C2 N2 C1 N1 12.14(15) . . . . ? 
C9 N2 C1 N1 -171.14(9) . . . . ? 
C2 N2 C1 S1 -166.63(8) . . . . ? 
C9 N2 C1 S1 10.10(13) . . . . ? 
C1 N2 C2 O1 170.97(12) . . . . ? 
C9 N2 C2 O1 -5.83(16) . . . . ? 
C1 N2 C2 C3 -9.77(15) . . . . ? 
C9 N2 C2 C3 173.44(9) . . . . ? 
O1 C2 C3 C8 -179.13(12) . . . . ? 
N2 C2 C3 C8 1.64(15) . . . . ? 
O1 C2 C3 C4 2.53(18) . . . . ? 
N2 C2 C3 C4 -176.70(10) . . . . ? 
C8 C3 C4 C5 -0.03(17) . . . . ? 
C2 C3 C4 C5 178.31(11) . . . . ? 
C3 C4 C5 C6 0.25(17) . . . . ? 
C4 C5 C6 C7 -0.18(18) . . . . ? 
C5 C6 C7 C8 -0.11(18) . . . . ? 
C4 C3 C8 N1 -178.24(10) . . . . ? 
C2 C3 C8 N1 3.39(15) . . . . ? 
C4 C3 C8 C7 -0.26(16) . . . . ? 
C2 C3 C8 C7 -178.63(10) . . . . ? 
C1 N1 C8 C3 -1.04(16) . . . . ? 
C1 N1 C8 C7 -179.03(10) . . . . ? 
C6 C7 C8 C3 0.33(18) . . . . ? 
C6 C7 C8 N1 178.28(10) . . . . ? 
C1 N2 C9 C14 -98.78(12) . . . . ? 
C2 N2 C9 C14 78.18(13) . . . . ? 
C1 N2 C9 C10 83.40(12) . . . . ? 
C2 N2 C9 C10 -99.64(12) . . . . ? 
C14 C9 C10 C11 1.68(16) . . . . ? 
N2 C9 C10 C11 179.49(10) . . . . ? 
C9 C10 C11 C12 -0.01(16) . . . . ? 
C15 O2 C12 C13 5.19(16) . . . . ? 
C15 O2 C12 C11 -174.39(10) . . . . ? 
C10 C11 C12 O2 178.31(10) . . . . ? 
C10 C11 C12 C13 -1.29(16) . . . . ? 
O2 C12 C13 C14 -178.63(10) . . . . ? 
C11 C12 C13 C14 0.93(16) . . . . ? 
C10 C9 C14 C13 -2.04(16) . . . . ? 
N2 C9 C14 C13 -179.82(10) . . . . ? 
C12 C13 C14 C9 0.72(17) . . . . ? 
 
_diffrn_measured_fraction_theta_max    0.998 
_diffrn_reflns_theta_full              29.97 
_diffrn_measured_fraction_theta_full   0.998 
_refine_diff_density_max    0.347 
_refine_diff_density_min   -0.150 
_refine_diff_density_rms    0.049 
